# Supplementary material for: Impacts of Air–sea Coupling on Systematic Errors in Medium-Range Winter Forecasts over the North Pacific and North Atlantic
Source: Copernicus journal article supplement (doi:10.5194/egusphere-2025-4142), 2025-09-10
Supplement: Supplementary file 1 [file egusphere-2025-4142-supplement.pdf]

# Supplementary Information of paper “Impacts of Air–sea Coupling on Systematic Errors in Medium-Range Winter Forecasts over the North Pacific and North Atlantic”

TIENT-YIAO HSU<sup>a,\*</sup>, MATTHEW R. MAZLOFF<sup>b</sup>, SARAH T. GILLE<sup>b</sup>, HAI LIN<sup>c</sup>, K. ANDREW PETERSON<sup>c</sup>, RUI SUN<sup>b</sup>, ANEESH C. SUBRAMANIAN<sup>d</sup>, AND LUCA DELLE MONACHE<sup>a</sup>

<sup>a</sup> Center for Western Weather and Water Extremes, Scripps Institution of Oceanography, University of California, San Diego, La Jolla, California, United States

<sup>b</sup> Scripps Institution of Oceanography, University of California San Diego, La Jolla, California, United States

<sup>c</sup> Atmospheric Science and Technology Directorate, Environment and Climate Change Canada (ECCC), Dorval, Québec, Canada

<sup>d</sup> Department of Atmospheric and Oceanic Sciences, University of Colorado Boulder, Boulder, Colorado, United States

\* Corresponding author: Tien-Yiao Hsu, [tienyiao@ucsd.edu](mailto:tienyiao@ucsd.edu)

This document contains 2 tables and 2 figures.

## 1. TABLES

**Table S1.** GEPS5 data count. Note that there are 20 years and 4 ensemble members.

| Month | Count per year per member | Valid dates       |
|-------|---------------------------|-------------------|
| Jan   | 5                         | 3, 10, 17, 24, 31 |
| Feb   | 4                         | 7, 14, 21, 28     |
| Mar   | 4                         | 7, 14, 21, 28     |
| Apr   | 4                         | 4, 11, 18, 25     |
| May   | 5                         | 2, 9, 16, 23, 30  |
| Jun   | 4                         | 6, 13, 20, 27     |
| Jul   | 0                         | N/A               |
| Aug   | 0                         | N/A               |
| Sep   | 1                         | 27                |
| Oct   | 4                         | 4, 11, 18, 25     |
| Nov   | 5                         | 1, 8, 15, 22, 29  |
| Dec   | 4                         | 6, 13, 20, 27     |

**Table S2.** GEPS6 data count and their start dates. The count of subsampled GEPS6 is documented in parentheses, and the start dates are underlined. Note that there are 20 years and 4 ensemble members.

| Month | Count per year per member | Valid dates                                                                            |
|-------|---------------------------|----------------------------------------------------------------------------------------|
| Jan   | 9 (5)                     | <u>2</u> , 7, <u>9</u> , 14, <u>16</u> , 21, <u>23</u> , 28, <u>30</u>                 |
| Feb   | 8 (4)                     | 4, <u>6</u> , 11, <u>13</u> , 18, <u>20</u> , 25, <u>27</u>                            |
| Mar   | 8 (4)                     | 4, <u>5</u> , 11, <u>12</u> , 18, <u>19</u> , 25, <u>26</u>                            |
| Apr   | 10 (5)                    | 1, <u>2</u> , 8, <u>9</u> , 15, <u>16</u> , 22, <u>23</u> , 29, <u>30</u>              |
| May   | 8 (4)                     | 6, <u>7</u> , 13, <u>14</u> , 20, <u>21</u> , 27, <u>28</u>                            |
| Jun   | 8 (4)                     | 3, <u>4</u> , 10, <u>11</u> , 17, <u>18</u> , 24, <u>25</u>                            |
| Jul   | 11 (0)                    | 1, 2, 8, 9, 15, 16, 22, 23, 25, 29, 30                                                 |
| Aug   | 13 (0)                    | 1, 5, 6, 8, 12, 13, 15, 19, 20, 22, 26, 27, 29                                         |
| Sep   | 13 (1)                    | 2, 3, 5, 9, 10, 12, 16, 17, 19, 23, 24, <u>26</u> , 30                                 |
| Oct   | 13 (5)                    | 1, <u>3</u> , 7, <u>10</u> , 14, 15, <u>17</u> , 21, 22, <u>24</u> , 28, 29, <u>31</u> |
| Nov   | 12 (4)                    | 4, 5, <u>7</u> , 11, 12, <u>14</u> , 18, 19, <u>21</u> , 25, 26, <u>28</u>             |
| Dec   | 9 (4)                     | 3, <u>5</u> , 10, <u>12</u> , 17, <u>19</u> , 24, <u>26</u> , 31                       |

## 2. PLOTS

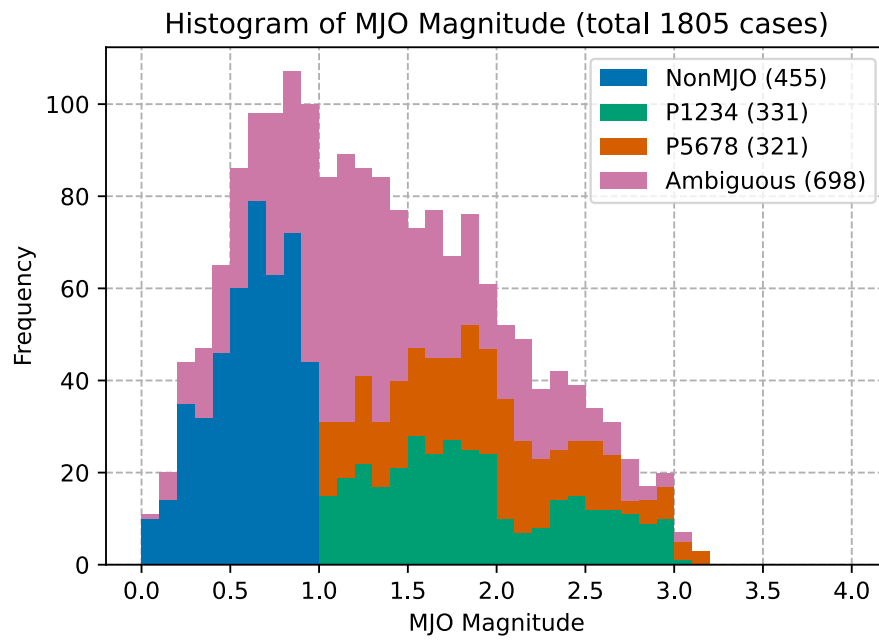

**Fig. S1.** Histogram of start dates classified with MJO groups: NonMJO, P1234, P5678, and Ambiguous.
